# Supplementary material
Source: Springer Nature journal article supplement (https://www.springermedizin.de/resource/supplementary/12885_2012_3342_MOESM1_ESM.pdf/9463276)
Supplement: MOESM1 [file 9463276]

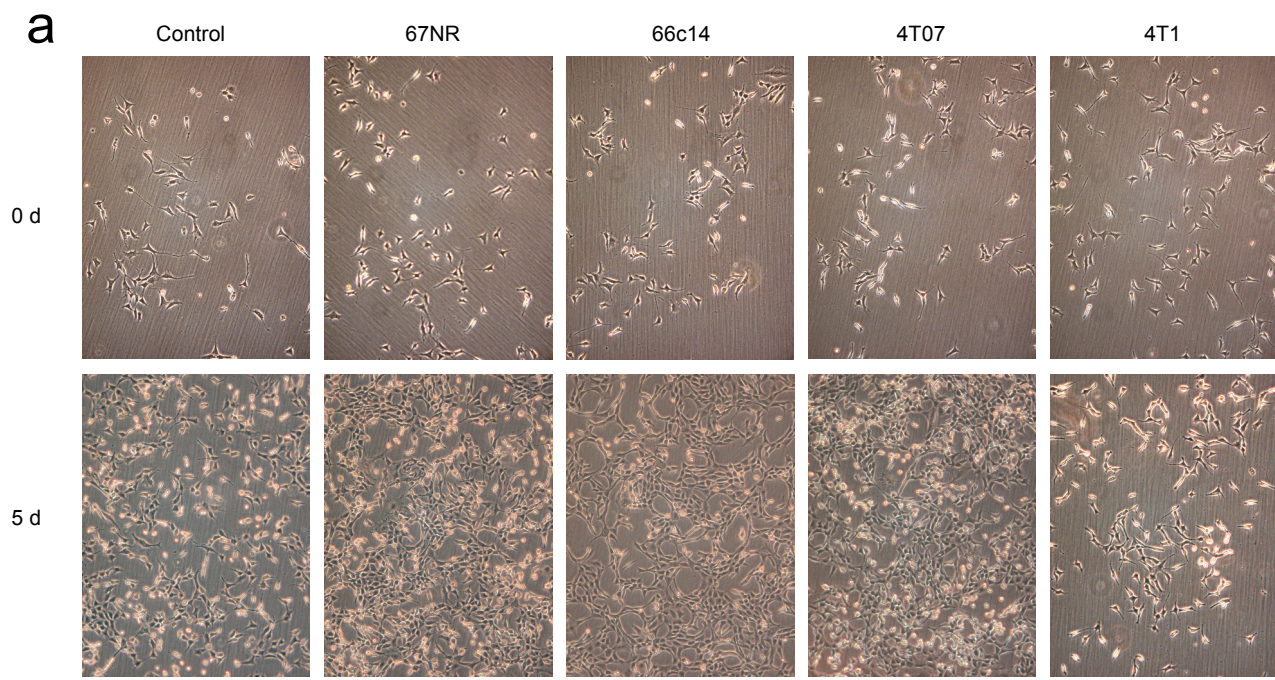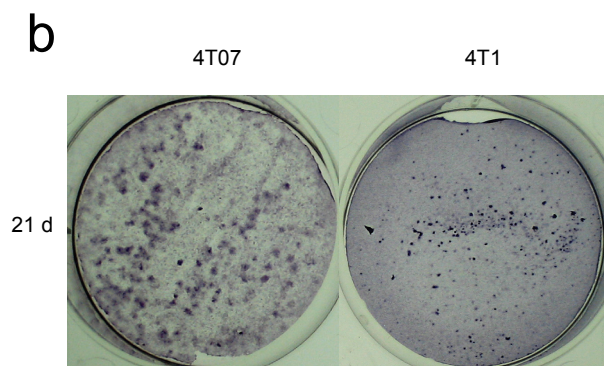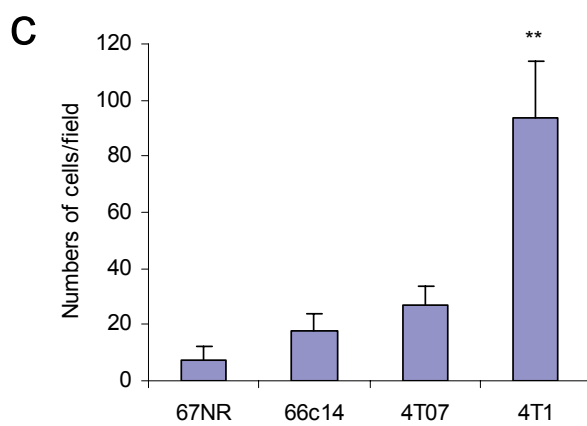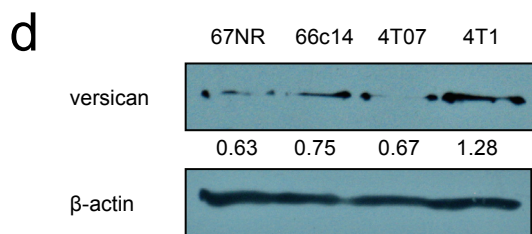

Figure S1
